# Supplementary material for: Selectively Targeting Breast Cancer Stem Cells by 8-Quinolinol and Niclosamide
Source: MDPI journal article supplement (doi:10.3390/ijms231911760), 2022-10-04
Supplement: s1 [file s1]

## Selectively targeting breast cancer stem cells by 8-quinolinol and niclosamide

Patricia Cámara-Sánchez<sup>1,2,3</sup>, Zamira V. Díaz-Riascos<sup>1,2,3</sup>, Natalia García-Aranda<sup>1,2,3</sup>, Petra Gener<sup>2,3</sup>, Joaquín Seras-Franzoso<sup>2,3</sup>, Micaela Giani-Alonso<sup>1,2</sup>, Miriam Royo<sup>3,4</sup>, Esther Vázquez<sup>3,5</sup>, Simó Schwartz Jr.<sup>2,3</sup>, Ibane Abasolo<sup>1,2,3\*</sup>

## 1. MATERIALS

**Table S1. Summary of anti-CSC drugs tested in vitro.** Representation of the chemical structure composition, name (drug abbreviation into brackets), CAS number and bibliographical references of the anti-CSC drugs selected in this work.

| Anti-CSC drug                                                                                                                                    | Anti-CSC drug                                                                                                                                  |
|--------------------------------------------------------------------------------------------------------------------------------------------------|------------------------------------------------------------------------------------------------------------------------------------------------|
| 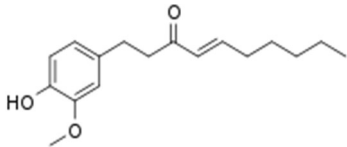 <p><b>6-shogaol (6-SHO)</b><br/>555-66-8</p> <p>[1,2]</p>    |  <p><b>8-quinolinol (8Q)</b><br/>148-24-3</p> <p>[3]</p>   |
|  <p><b>Acetaminophen (ACE)</b><br/>03-90-2</p> <p>[4,5]</p>   |  <p><b>Citral (CIT)</b><br/>5392-40-5</p> <p>[6,7]</p>     |
|  <p><b>Defactinib (DFT)</b><br/>1073154-85-4</p> <p>[8,9]</p> |  <p><b>Disulfiram (DSF)</b><br/>97-77-8</p> <p>[10–12]</p> |

|                                                                                                                                                     |                                                                                                                                                             |
|-----------------------------------------------------------------------------------------------------------------------------------------------------|-------------------------------------------------------------------------------------------------------------------------------------------------------------|
| 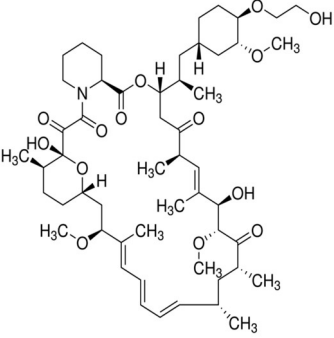 <p><b>Everolimus (EVE)</b><br/>159351-69-6</p>                    |  <p><b>Flubendazole (FLU)</b><br/>31430-15-6</p> <p>[15-17]</p>           |
| <p>[13,14]</p>                                                                                                                                      |  <p><b>Glabridin (GLA)</b><br/>59870-68-7</p> <p>[18,19]</p>              |
|  <p><b>Isoliquiritigenin (ISO)</b><br/>961-29-5</p> <p>[20,21]</p> |  <p><b>Metformin hydrochloride (MET)</b><br/>1115-70-4</p> <p>[22,23]</p> |
|  <p><b>Niclosamide (NCS)</b><br/>50-65-7</p> <p>[24,25]</p>      |  <p><b>Nitidine chloride (NTC)</b><br/>13063-04-2</p> <p>[26,27]</p>    |
|  <p><b>Panobinostat (PNB)</b><br/>404950-80-7</p> <p>[28,29]</p> |  <p><b>Salinomycin (SAL)</b><br/>53003-10-4</p> <p>[29-31]</p>          |
|  <p><b>VS-5584 (VS)</b><br/>1246560-33-7</p> <p>[32,33]</p>      |  <p><b>YM-155 hydrochloride (YM)</b><br/>355406-09-6</p> <p>[34,35]</p> |

## 2. RESULTS

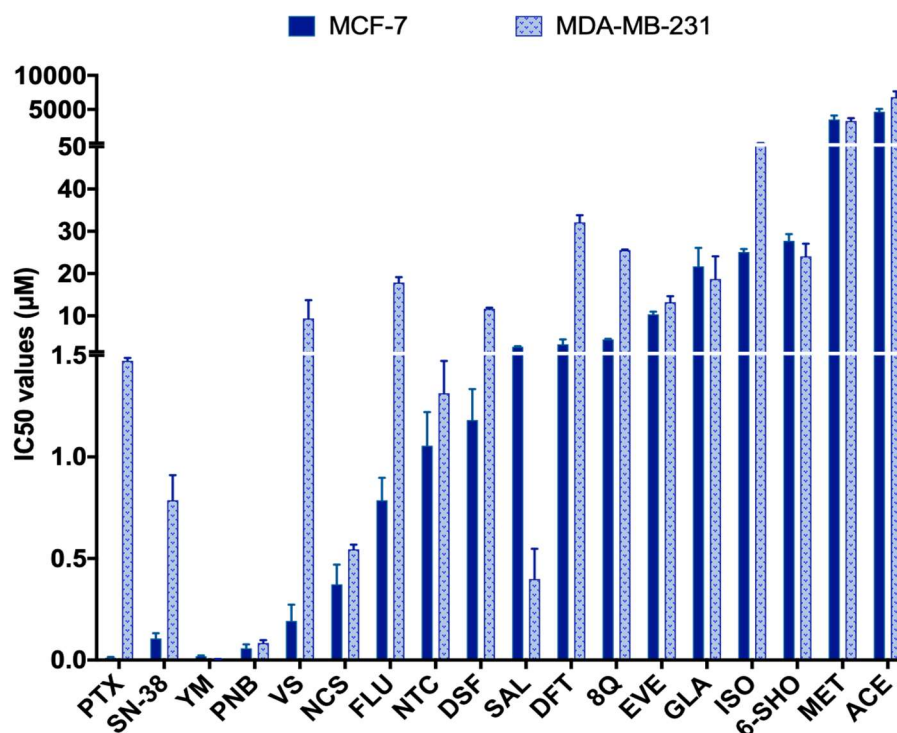

**Figure S1. Differential responses of MCF-7 and MDA-MB-231 cell lines to tested compounds.** Both cell lines were treated with increasing concentrations of selected drugs for 72 h. Afterwards, IC<sub>50</sub> values for each compound in both cell lines were calculated. IC<sub>50</sub> values are represented as the mean  $\pm$  SEM of three independent experiments.

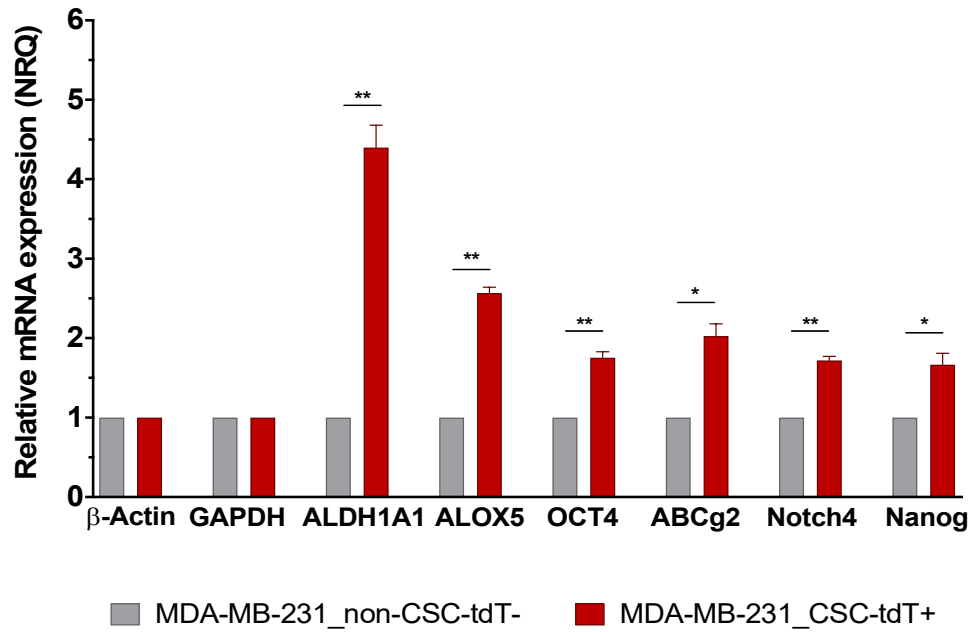

**Figure S2.** Stem cell-like gene expression profile of enriched CSC and non-CSC subpopulations from MDA-MB-231 fluorescent model measured by qRT-PCR. The stem cell phenotype of tdTomato+ cells was confirmed by a significative overexpression of all the stem cell markers analysed. Results are expressed as NRQ (normalized relative quantities) mean  $\pm$  SEM ( $n \geq 3$ ).

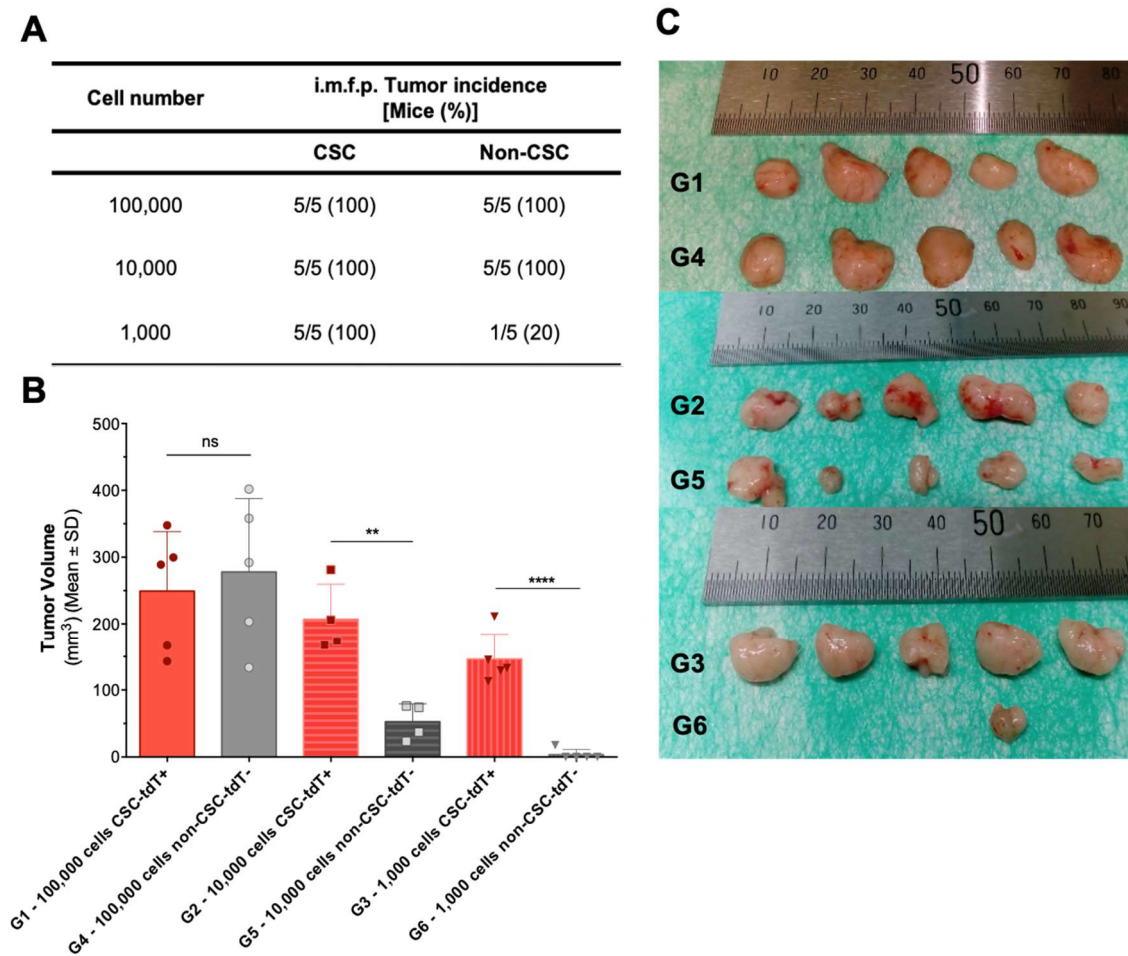

**Figure S3.** Tumor initiation capacity of tdTomato<sup>+</sup> and tdTomato<sup>-</sup> in HCC-1806.RedFluc.ALDH1A1-tdTomato model. A) Mice were inoculated i.m.f.p. with 100,000, 10,000 and 1,000 of tdTomato<sup>+</sup> or of tdTomato<sup>-</sup> cells and tumor incidence was evaluated 28 days post-inoculation. B) Ex vivo tumor volumes at 28 days post-inoculation. C) Representative image of the size of excised tumors at 28 days post-inoculation. Differences were regarded as statistically significant (non-parametric Kruskal–Wallis test and unpaired students's t-post test) when p-value was smaller than 0.01 (\*\*).

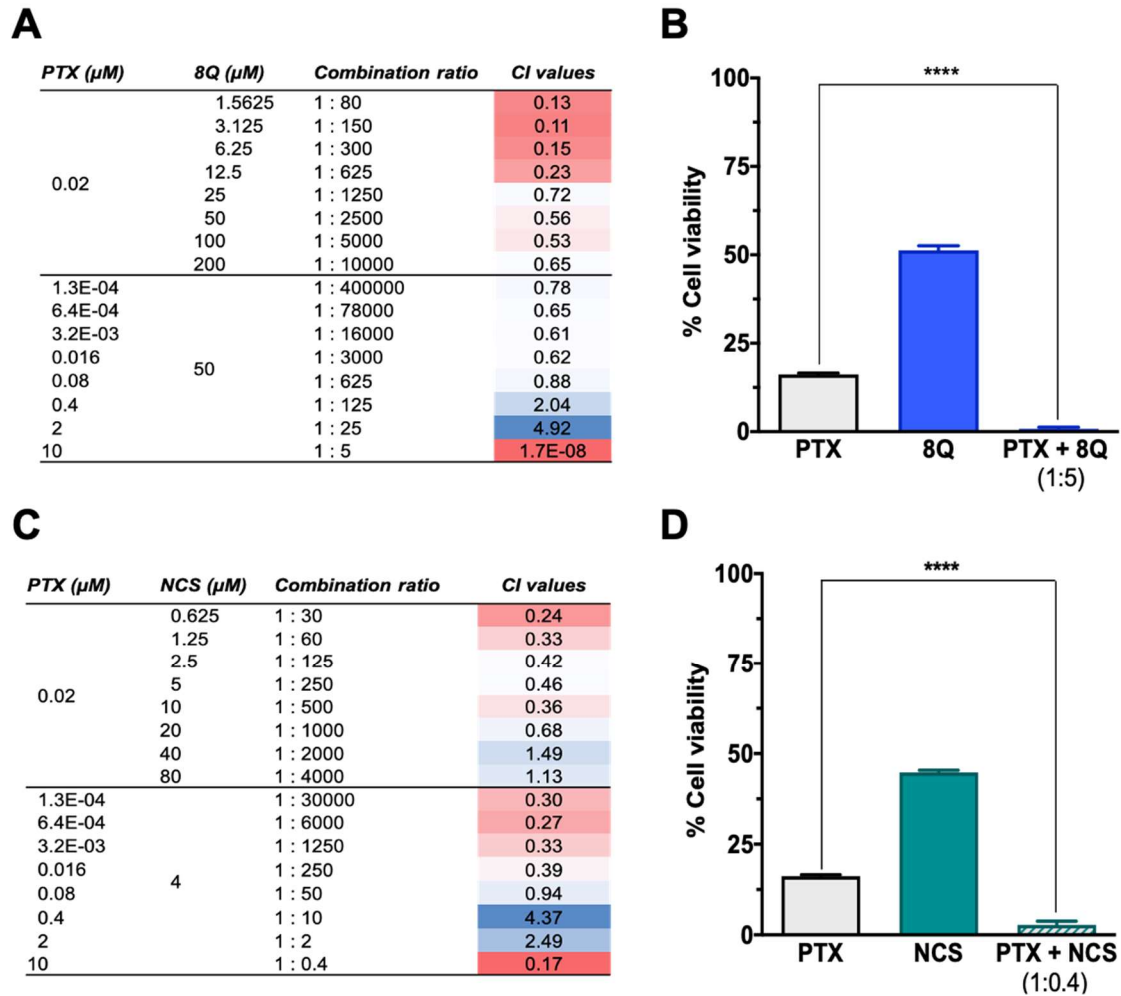

**Figure S4.** The anti-CSC drugs 8Q and NCS displayed a synergistic inhibition of cell viability when combined with the chemotherapeutic drug PTX in HCC-1806 cell line. Heat maps of (A) PTX with 8Q and (C) PTX with NCS combined treatments. Graphs show representative results of cell viability (%) when cells were treated with (B) PTX and 8Q or (D) PTX and NCS, as individual therapy and in combination at 1:5 or 1:0.4 ratios, respectively. Data is represented as the mean  $\pm$  SEM of three independent experiments.

**A**

| PTX ( $\mu$ M) | 8Q ( $\mu$ M) | Combination ratio | CI values |
|----------------|---------------|-------------------|-----------|
| 0.005          | 0.39063       | 1 : 80            | 1.69      |
|                | 0.78125       | 1 : 150           | 1.59      |
|                | 1.5625        | 1 : 300           | 1.44      |
|                | 3.125         | 1 : 625           | 1.30      |
|                | 6.25          | 1 : 1250          | 0.02      |
|                | 12.5          | 1 : 2500          | 0.05      |
|                | 25            | 1 : 5000          | 0.05      |
|                | 50            | 1 : 10000         | 0.10      |
| 3.1E-03        | 8             | 1 : 2500          | 0.06      |
| 6.3E-03        |               | 1 : 1000          | 0.05      |
| 0.0125         |               | 1 : 600           | 1.49      |
| 0.025          |               | 1 : 300           | 1.15      |
| 0.05           |               | 1 : 160           | 1.33      |
| 0.1            |               | 1 : 80            | 1.47      |
| 0.2            |               | 1 : 40            | 2.24      |
| 0.4            |               | 1 : 20            | 2.59      |

**B**

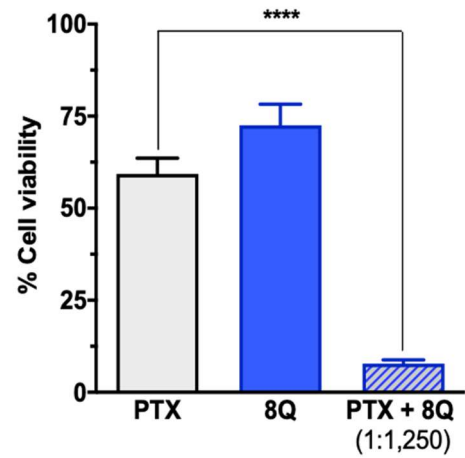

**C**

| PTX ( $\mu$ M) | NCS ( $\mu$ M) | Combination ratio | CI values |
|----------------|----------------|-------------------|-----------|
| 0.005          | 0.15625        | 1 : 30            | 1.25      |
|                | 0.3125         | 1 : 60            | 1.10      |
|                | 0.625          | 1 : 125           | 0.69      |
|                | 1.25           | 1 : 250           | 0.51      |
|                | 2.5            | 1 : 500           | 0.17      |
|                | 5              | 1 : 1000          | 0.12      |
|                | 10             | 1 : 2000          | 0.15      |
|                | 20             | 1 : 4000          | 0.16      |
| 3.1E-03        | 2              | 1 : 600           | 0.18      |
| 6.3E-03        |                | 1 : 300           | 0.21      |
| 0.0125         |                | 1 : 160           | 0.30      |
| 0.025          |                | 1 : 80            | 0.56      |
| 0.05           |                | 1 : 40            | 1.13      |
| 0.1            |                | 1 : 20            | 2.08      |
| 0.2            |                | 1 : 10            | 3.51      |
| 0.4            |                | 1 : 5             | 3.99      |

**D**

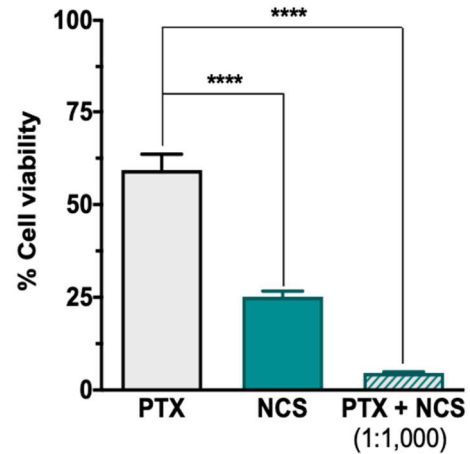

**Figure S5. Combination of 8Q or NCS anti-CSC drugs with PTX enhances their synergistic cytotoxic effect in MDA-MB-468 cells.** Heat maps of (A) PTX with 8Q and (C) PTX with NCS combined studies. (B, D) Synergism of the combination of anti-CSC drugs with PTX at selected ratios in MDA-MB-468 cells, represented as the % of cell viability obtained when cells are treated with (B) PTX and 8Q or (D) PTX and NCS, alone and in combination at 1:1,250 or 1:1,000 ratios, respectively. Data is represented as the mean  $\pm$  SEM of three independent experiments.

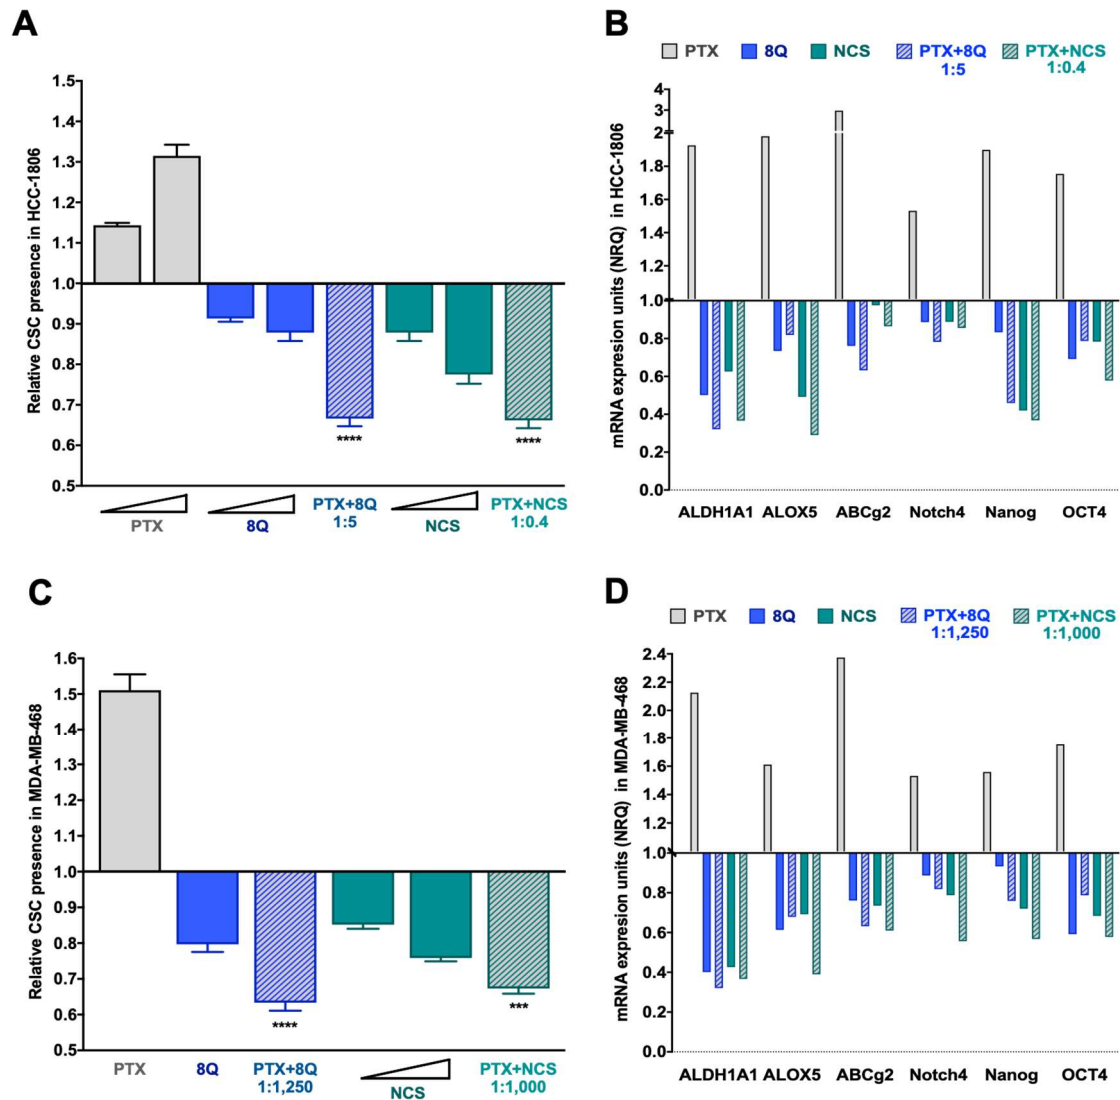

**Figure S6. Anti-CSC activity of 8Q and NCS in combination with PTX in TNBC fluorescent CSC models.** Relative CSC-tdTomato<sup>+</sup> presence in **(A)** HCC-1806 and **(C)** MDA-MB-468 fluorescent models, determined by flow cytometry and referred to control condition. Values below, equal or above 1 indicate reduction, maintenance or increase of CSC-tdTomato<sup>+</sup>, respectively. Data is represented as the mean  $\pm$  SEM of three independent experiments. Statistic t-test analysis were performed comparing combination treatments with individual anti-CSC drugs at the corresponding equivalent drug dose. Changes in the stem cell gene expression profile of **(B)** HCC-1806 and **(D)** MDA-MB-468 models determined by quantitative RT-PCR. Results are expressed as normalized relative quantities (NRQ) and referred to control condition. Concentrations tested for drugs in the HCC-1806 cell line were 0.0025 and 5  $\mu$ M for PTX, 25 and 50  $\mu$ M for 8Q, 2 and 5  $\mu$ M for NCS, while for MDA-MB-468 were 0.005 for PTX, 6.25  $\mu$ M for 8Q, 2.5 and 5  $\mu$ M for NCS, and the corresponding combined ratios.



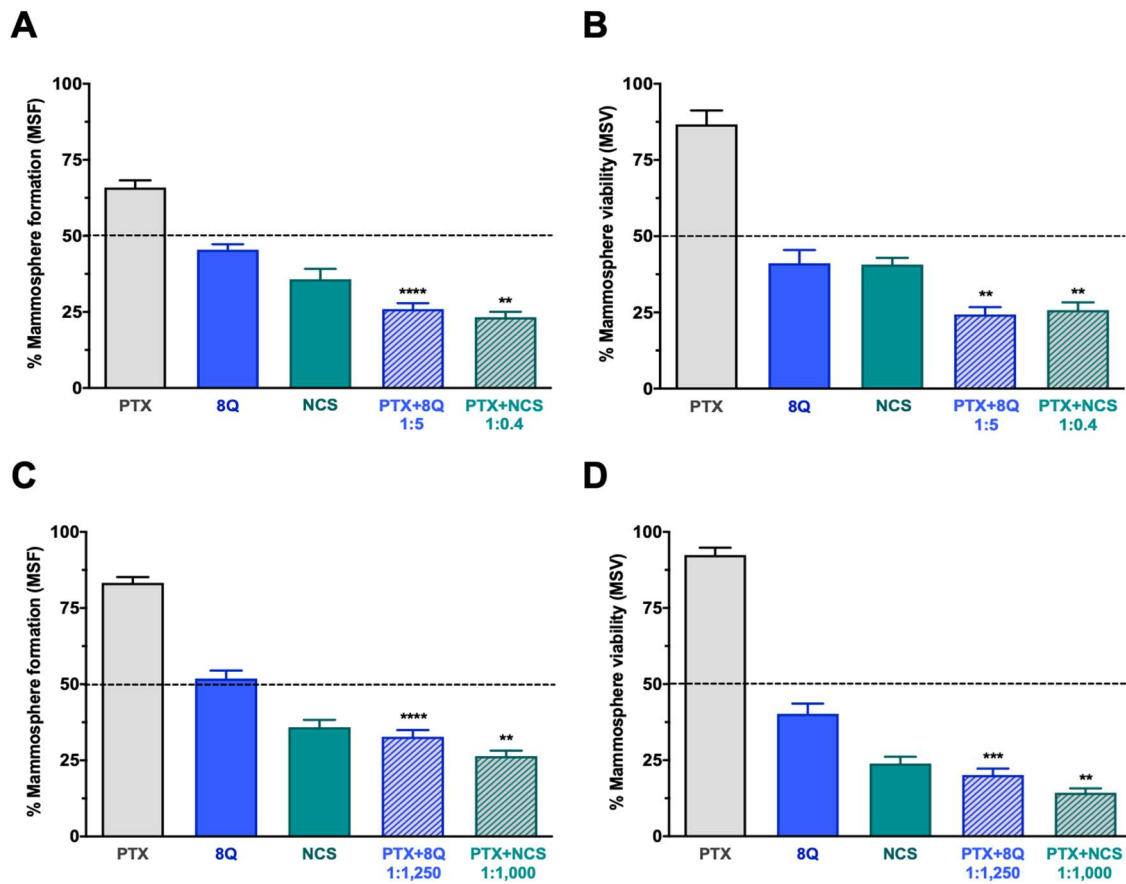

**Figure S7. Combination of 8Q or NCS anti-CSC drugs with PTX enhances their synergistic anti-CSC activity in low attachment conditions in other TNBC cell lines.** Efficacy of 8Q and NCS, alone and in combination in reducing mammosphere-forming efficiency (MSF) in both **A**) HCC-1806 and **C**) MDA-MB-468 cells, and in affecting mammosphere viability (MSV) in **B**) HCC-1806 and in **D**) MDA-MB-468 cell lines. Data is represented as the mean  $\pm$  SEM of three independent experiments and referred to non-treated control condition. Drug concentrations used PTX 10  $\mu$ M, 8Q 50  $\mu$ M and NCS 4  $\mu$ M in HCC-1806 cells, while for MDA-MB-468 cells were 0.005  $\mu$ M, 6.25  $\mu$ M and 5  $\mu$ M, respectively. Statistical analysis of combined therapy in comparison with individual anti-CSC treatments are shown in black asterisks.

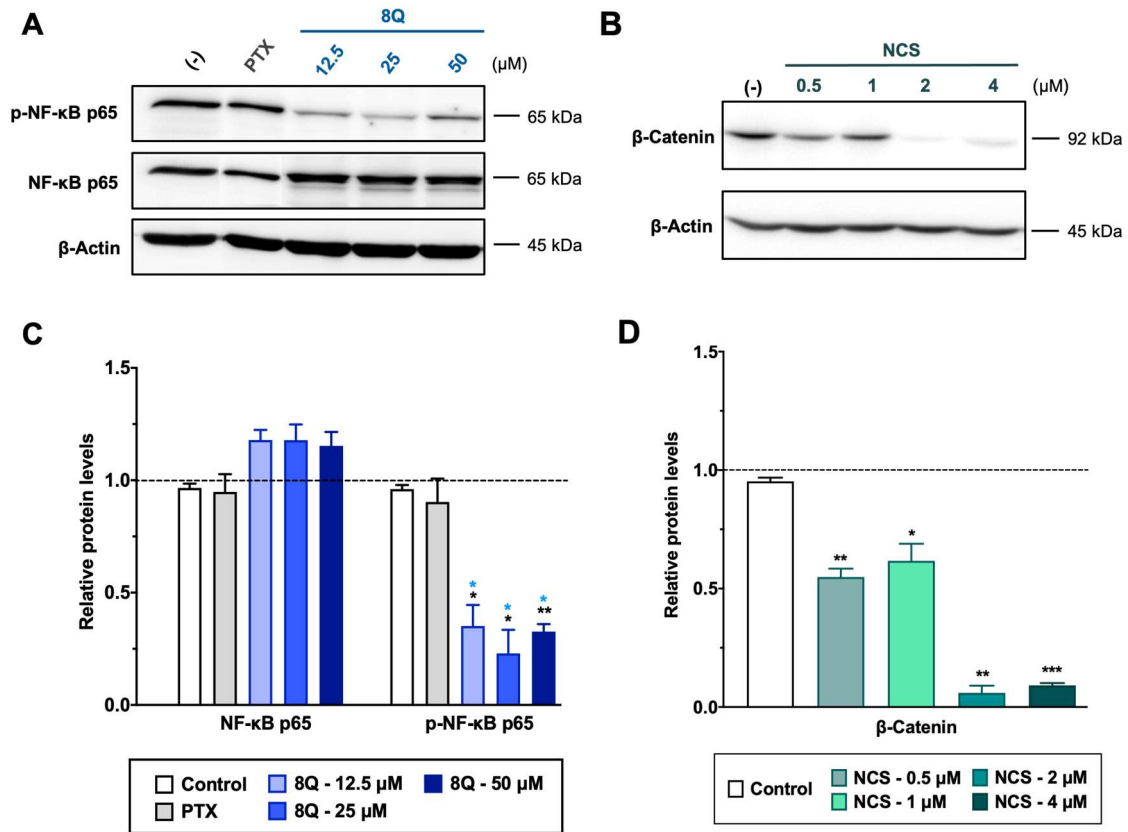

**Figure S8. Effect of the combination of 8Q or NCS with PTX in NF-κB and Wnt/β-catenin signaling pathways in MDA-MB-231 cells.** **A)** Representative Western blots of total and phosphorylated NF-κB (p-NF-κB) p65 protein levels upon treatment with different concentrations of 8Q. **B)** Representative Western blots of β-Catenin levels after treatment with increasing concentrations of NCS. The β-actin protein expression level was used as loading control. **C-D)** Graphs represent the quantification band intensity signal referred to β-actin expression, represented as mean ± SEM of three independent experiments. Statistic t-test analysis of anti-CSC drug therapy was performed in comparison with control non-treated cells (black) as well as with PTX treatment (blue).

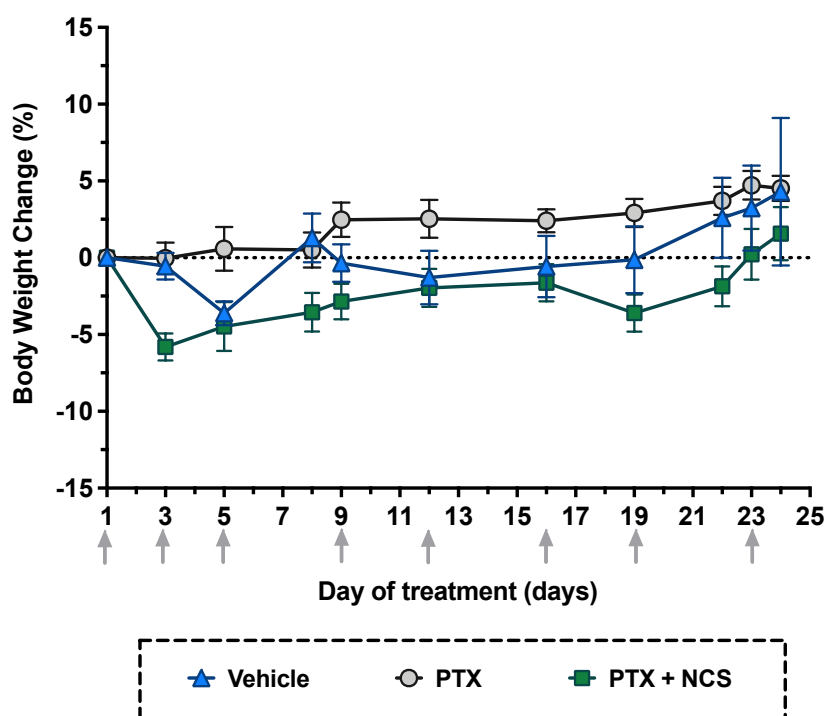

**Figure S9.** Body weight changes from all three-study groups throughout the experiment. Determination of body weight change referred to the initial weight of mice (before starting the treatments). Results are expressed as mean  $\pm$  SEM,  $n \geq 4$ .

### 3. REFERENCES:

1. Ray A.; Vasudevan S.; Sengupta S. 6-Shogaol inhibits breast cancer cells and stem cell-like spheroids by modulation of Notch signaling pathway and induction of autophagic cell death. *PLoS One*. **2015**, *10*, 1–23.
2. Wu C.H.; Hong B.H.; Ho C.T.; Yen G.C. Targeting cancer stem cells in breast cancer: Potential anticancer properties of 6-shogaol and pterostilbene. *J Agric Food Chem*. **2015**, *63*, 2432–41.
3. Zhou J.; Zhang H.; Gu P.; Margolick J.B.; Yin D.; Zhang Y. Cancer stem/progenitor cell active compound 8-quinolinol in combination with paclitaxel achieves an improved cure of breast cancer in the mouse model. *Breast Cancer Res Treat*. **2009**, *115*, 269–77.
4. Ahmed M.; Jinks N.; Babaei-Jadidi R.; Kashfi H.; Castellanosuribe M.; May S.T.; Mukherjee A.; Nateri A.S. Repurposing antibacterial AM404 as a potential anticancer drug for targeting colorectal cancer stem-like cells. *Cancers (Basel)*. **2020**, *12*, 106.
5. Takehara M.; Hoshino T.; Namba T.; Yamakawa N.; Mizushima T. Acetaminophen-induced differentiation of human breast cancer stem cells and inhibition of tumor xenograft growth in mice. *Biochem Pharmacol*. **2011**, *81*, 1124–35.
6. Nigjeh S.E.; Yeap S.K.; Nordin N.; Rahman H.; Rosli R. In vivo anti-tumor effects of citral on 4T1 breast cancer cells via induction of apoptosis and downregulation of aldehyde dehydrogenase activity. *Molecules*. **2019**, *24*, 3241.

7. Thomas M.L.; de Antueno R.; Coyle K.M.; Sultan M.; Cruickshank B.M.; Giacomantonio M.A.; Giacomantonio C.A.; Duncan R.; Marcato P. Citral reduces breast tumor growth by inhibiting the cancer stem cell marker ALDH1A3. *Mol Oncol.* **2016**, *10*, 1485–96.
8. Kolev V.N.; Tam W.F.; Wright Q.G.; McDermott S.P.; Vidal C.M.; Shapiro I.M.; Xu Q.; Wicha M.S.; Pachter J.A.; Weaver D.T. Inhibition of FAK kinase activity preferentially targets cancer stem cells. *Oncotarget.* **2017**, *8*, 51733–47.
9. Navas T.; Pfister T.D.; Colantonio S.; Aziz A.; Dieckman L.; Saul R.G.; Kaczmarczyk J.; Borgel S.; Alcoser S.Y.; Hollingshead M.G.; et al. Novel antibody reagents for characterization of drug- and tumor microenvironment-induced changes in epithelial-mesenchymal transition and cancer stem cells. *PLoS One.* **2018**, *13*, 1–25.
10. Yip N.C.; Fombon I.S.; Liu P.; Brown S.; Kannappan V.; Armesilla A.L.; Xu B.; Cassidy J.; Darling J.L.; Wang W. Disulfiram modulated ROS-MAPK and NFB pathways and targeted breast cancer cells with cancer stem cell-like properties. *Br J Cancer.* **2011**, *104*, 1564–74.
11. Kim Y.J.; Kim J.Y.; Lee N.; Oh E.; Sung D.; Cho T.M.; Seo J.H. Disulfiram suppresses cancer stem-like properties and STAT3 signaling in triple-negative breast cancer cells. *Biochem Biophys Res Commun.* **2017**, *486*, 1069–76.
12. Yang Z.; Guo F.; Albers A.E.; Sehouli J.; Kaufmann A.M. Disulfiram modulates ROS accumulation and overcomes synergistically cisplatin resistance in breast cancer cell lines. *Biomed Pharmacother.* **2019**, *113*, 108727.
13. Yunokawa M.; Koizumi F.; Kitamura Y.; Katanasaka Y.; Okamoto N.; Kodaira M.; Yonemori K.; Shimizu C.; Ando M.; Masutomi K.; et al. Efficacy of everolimus, a novel mTOR inhibitor, against basal-like triple-negative breast cancer cells. *Cancer Sci.* **2012**, *103*, 1665–71.
14. Chen L.; Yang G.; Dong H. Everolimus reverses palbociclib resistance in ER+ human breast cancer cells by inhibiting phosphatidylinositol 3-kinase(PI3K)/Akt/ mammalian target of rapamycin (mTOR) pathway. *Med Sci Monit.* **2019**, *25*:77–86.
15. Oh E.; Kim Y.J.; An H.; Sung D.; Cho T.M.; Farrand L.; Jang S.; Seo J.H.; Kim J.Y. Flubendazole elicits anti-metastatic effects in triple-negative breast cancer via STAT3 inhibition. *Int J Cancer.* **2018**, *143*:1978–93.
16. Kim Y.J.; Sung D.; Oh E.; Cho Y.; Cho T.M.; Farrand L.; Seo J.H.; Kim J.Y. Flubendazole overcomes trastuzumab resistance by targeting cancer stem-like properties and HER2 signaling in HER2-positive breast cancer. *Cancer Lett.* **2018**, *412*:118–30.
17. Hou Z.J.; Luo X.; Zhang W.; Peng F.; Cui B.; Wu S.J.; Zheng F.M.; Xu J.; Xu L.Z.; Long Z.J.; et al. Flubendazole, FDA-approved anthelmintic, targets breast cancer stem-like cells. *Oncotarget.* **2015**, *6*, 6326–40.
18. Jiang F.; Li Y.; Mu J.; Hu C.; Zhou M.; Wang X.; Si L.; Ning S.; Li Z. Glabridin inhibits cancer stem cell-like properties of human breast cancer cells: An epigenetic regulation of miR-148a/SMAd2 signaling. *Mol Carcinog.* **2016**, *55*, 929–40.
19. Qian J.; Xia M.; Liu W.; Li L.; Yang J.; Mei Y.; Meng Q.; Xie Y. Glabridin resensitizes p-glycoprotein-overexpressing multidrug-resistant cancer cells to conventional chemotherapeutic agents. *Eur J Pharmacol.* **2019**, *852*, 231–43.
20. Lin P.H.; Chiang Y.F.; Shieh T.M.; Chen H.Y.; Shih C.K.; Wang T.H.; Wang K.L.; Huang T.C.; Hong Y.H.; Li S.C.; et al. Dietary compound isoliquiritigenin, an antioxidant from licorice, suppresses triple-negative breast tumor growth via apoptotic death program activation in cell and xenograft animal models. *Antioxidants.* **2020**, *9*, 228.

21. Peng F.; Tang H.; Liu P.; Shen J.; Guan X.; Xie X.; Gao J.; Xiong L.; Jia L.; Chen J.; Peng C. Isoliquiritigenin modulates MIR-374a/PTEN/Akt axis to suppress breast cancer tumorigenesis and metastasis. *Sci Rep.* **2017**, 7, 9022.
22. Jung JW, Park SB, Lee SJ, Seo MS, Trosko JE, Kang KS. Metformin represses self-renewal of the human breast carcinoma stem cells via inhibition of estrogen receptor-mediated OCT4 expression. *PLoS One.* **2011**, 6, 1–9.
23. Vazquez-Martin A.; Oliveras-Ferraro C.; Del Barco S.; Martin-Castillo B.; Menendez J.A. The anti-diabetic drug metformin suppresses self-renewal and proliferation of trastuzumab-resistant tumor-initiating breast cancer stem cells. *Breast Cancer Res Treat.* **2011**, 126, 355–64.
24. Liu J.; Chen X.; Ward T.; Pegram M.; Shen K. Combined niclosamide with cisplatin inhibits epithelial-mesenchymal transition and tumor growth in cisplatin-resistant triple-negative breast cancer. *Tumor Biol.* **2016**, 37, 9825–35.
25. Wang Y.C.; Chao T.K.; Chang C.C.; Yo Y.T.; Yu M.H.; Lai H.C. Drug screening identifies niclosamide as an inhibitor of breast cancer stem-like cells. *PLoS One.* **2013**, 8, e74538.
26. Sun M.; Zhang N.; Wang X.; Li Y.; Qi W.; Zhang H.; Li Z.; Yang Q. Hedgehog pathway is involved in nitidine chloride induced inhibition of epithelial-mesenchymal transition and cancer stem cells-like properties in breast cancer cells. *Cell Biosci.* **2016**, 6, 1–14.
27. Pan X.; Han H.; Wang L.; Yang L.; Li R.; Li Z.; Liu J, Zhao Q.; Qian M.; Liu M.; et al. Nitidine Chloride inhibits breast cancer cells migration and invasion by suppressing c-Src/FAK associated signaling pathway. *Cancer Lett.* **2011**, 313, 181–91.
28. Qin G.; Li Y.; Xu X.; Wang X.; Zhang K.; Tang Y.; Qiu H.; Shi D.; Zhang C.; Long Q.; et al. Panobinostat (LBH589) inhibits Wnt/ $\beta$ -catenin signaling pathway via upregulating APC expression in breast cancer. *Cell Signal.* **2019**, 59, 62–75.
29. Kai M.; Kanaya N.; Wu S.V.; Mendez C.; Nguyen D.; Luu T.; Chen S. Targeting breast cancer stem cells in triple-negative breast cancer using a combination of LBH589 and salinomycin. *Breast Cancer Res Treat.* **2015**, 151, 281–94.
30. Tyagi M.; Patro B.S. Salinomycin reduces growth, proliferation and metastasis of cisplatin resistant breast cancer cells via NF- $\kappa$ B deregulation. *Toxicol Vit.* **2019**, 60, 125–33.
31. Kamlund S.; Janicke B.; Alm K.; Oredsson S. Salinomycin treatment specifically inhibits cell proliferation of cancer stem cells revealed by longitudinal single cell tracking in combination with fluorescence microscopy. *Appl Sci.* **2020**, 10, 4732.
32. Kolev V.N.; Wright Q.G.; Vidal C.M.; Ring J.E.; Shapiro I.M.; Ricono J.; Weaver D.T.; Padval M.V.; Pachter J.A. Xu Q. PI3K/mTOR dual inhibitor VS-5584 preferentially targets cancer stem cells. *Cancer Res.* **2015**, 75, 446–55.
33. Hart S.; Novotny-Diermayr V.; Goh K.C.; Williams M.; Tan Y.C.; Ong L.C.; Cheong A.; Ng B.K.; Amalini C.; Madan B.; et al. VS-5584, a novel and highly selective PI3K/mTOR kinase inhibitor for the treatment of cancer. *Mol Cancer Ther.* **2013**, 12, 151–61.
34. Ookura M.; Fujii T.; Yagi H.; Ogawa T.; Kishi S.; Hosono N.; Shigemitsu H.; Yamauchi T.; Ueda T.; Yoshida A. YM155 exerts potent cytotoxic activity against quiescent (G0/G1) multiple myeloma and bortezomib resistant cells via inhibition of survivin and Mcl-1. *Oncotarget.* **2017**, 8, 111535–50.
35. Véquaud E.; Séveno C.; Loussouarn D.; Engelhart L.; Campone M.; Juin P.; Barillé-Nion S. YM155 potentially triggers cell death in breast cancer cells through an autophagy-NF- $\kappa$ B network. *Oncotarget.* **2015**, 6, 13476–86.
